# Supplementary material for: The Neutralizing Antibody Responses of Individuals That Spontaneously Resolve Hepatitis C Virus Infection
Source: MDPI journal article supplement (doi:10.3390/v14071391), 2022-06-25
Supplement: s1 [file s1]

**Table S1.** Clinical data of spontaneous resolvers with E1E2binding activity.

| Sera ID | Gender | Birth Year | Ethnicity | Date 1 <sup>st</sup> positive test | Earliest negative result | Date collection | HCV Gt | Est. yr of infection | Route infection |
|---------|--------|------------|-----------|------------------------------------|--------------------------|-----------------|--------|----------------------|-----------------|
| S3      | M      | 1962       | White     | 01.01.95                           | 30.5.07                  | 13.11.12        | NR     | 1978                 | IDU             |
| S8      | F      | 1984       | White     | 01.06.12                           | 13.10.12                 | 13.12.12        | NR     | 1999                 | IDU             |
| S9      | M      | 1973       | White     | 01.01.11                           | no PCR, ab+              | 19.12.12        | NR     | 2001                 | IDU             |
| S10     | M      | 1980       | White     | 01.01.08                           | 12.6.12                  | 03.01.13        | 1      | NR                   | IDU             |
| S12     | M      | 1964       | White     | 01.01.97                           | Ab+                      | 14.01.13        | 3      | 1980                 | IDU             |
| S15     | M      | 1979       | White     | 04.12.06                           | 24.1.13                  | 28.1.13         | 1      | NR                   | IDU             |
| S24     | F      | 1981       | White     | 30.03.11                           | Ab+                      | 04.02.13        | 3      | 2011                 | IDU             |
| S25     | M      | 1972       | White     | 02.12.98                           | 13.10.12                 | 11.02.13        | NR     | NR                   | IDU             |
| S32     | M      | 1962       | White     | 30.11.12                           | Ab+                      | 14.01.13        | NR     | 1986                 | IDU             |
| S35     | M      | 1979       | White     | NR                                 | 23.05.11                 | 11.03.13        | NR     | 1998                 | IDU             |
| S37     | F      | 1954       | White     | 04.09.09                           | Ab+                      | 18.03.13        | NR     | NR                   | IDU             |
| S39     | M      | 1981       | White     | 01.01.99                           | 14.03.13                 | 14.03.13        | NR     | 1997                 | IDU             |
| S41     | M      | 1954       | White     | 07.02.11                           | NR                       | 26.03.13        | 2      | 2006                 | IDU             |
| S53     | M      | 1948       | White     | NR                                 | 25.11.11                 | 24.05.13        | NR     | NR                   | IDU             |
| S58     | M      | 1979       | Asian     | 01.01.11                           | 08.09.13                 | 08.09.13        | NR     | NR                   | Born abroad     |
| S75     | M      | 1964       | White     | 14.11.04                           | 25.08.00                 | 09.01.13        | NR     | NR                   | Blood/ products |
| S78     | M      | 1978       | White     | 31.08.12                           | NR                       | 03.12.13        | NR     | NR                   | IDU             |
| S93     | M      | 1989       | White     | 23.08.13                           | 09.12.13                 | 27.01.14        | NR     | NR                   | IDU             |
| S95     | M      | 1955       | White     | 27.11.92                           | 24.08.09                 | 24.01.14        | NR     | 1970                 | IDU             |
| S102    | M      | 1966       | White     | 01.01.93                           | NR                       | 31.03.14        | NR     | NR                   | IDU             |
| S106    | F      | 1981       | White     | 01.09.05                           | NR                       | 11.06.14        | 1      | 2005                 | IDU             |
| S107    | M      | 1957       | White     | NR                                 | NR                       | 24.06.14        | 1      | NR                   | IDU             |
| S112    | M      | 1984       | White     | NR                                 | 26.06.14                 | 12.02.14        | NR     | 2006                 | IDU             |
| S113    | M      | 1976       | White     | 07.06.11                           | 11.09.11                 | 07.06.12        | NR     | NR                   | Tattoo          |
| S120    | M      | 1956       | White     | 07.08.02                           | 19.05.10                 | 17.07.12        | NR     | 1972                 | IDU             |
| S121    | F      | 1962       | White     | 01.08.12                           | 31.7.12                  | 03.10.97        | NR     | 1997                 | IDU             |
| S122    | M      | 1956       | White     | 08.09.99                           | 28.09.00                 | 31.07.12        | NR     | 1977                 | IDU             |
| S124    | M      | 1983       | White     | 01.01.04                           | NR                       | 19.06.14        | NR     | NR                   | IDU             |
| S125    | M      | 1977       | White     | NR                                 | NR                       | 20.06.14        | NR     | 2012                 | IDU             |
| S135    | F      | 1947       | Asian     | 20.06.11                           | NR                       | 08.09.14        | 3      | NR                   | Born abroad     |
| S151    | M      | 1966       | White     | 01.01.06                           | 12.06.13                 | 26.06.13        | other  | 2003                 | IDU             |
| S153    | M      | 1980       | White     | 30.04.13                           | NR                       | 04.07.13        | NR     | NR                   | IDU             |
| S156    | F      | 1983       | White     | 07.06.11                           | 31.01.12                 | 18.07.13        | NR     | NR                   | IDU             |
| S197    | F      | 1947       | Asian     | 20.06.11                           | NR                       | 08.09.14        | 3      | NR                   | Born abroad     |
| S887    | M      | 1973       | White     | 30.08.11                           | NR                       | 26.08.13        | NR     | NR                   | IDU             |
| S888    | M      | 1983       | Other     | 01.04.13                           | NR                       | 29.08.13        | 4      | 2013                 | IDU             |
| S889    | M      | 1986       | White     | NR                                 | NR                       | 29.08.13        | 3      | NR                   | IDU             |
| S890    | M      | 1979       | White     | 01.01.12                           | 18.09.13                 | 03.12.13        | 3      | NR                   | Prison          |
| S893    | M      | 1960       | White     | 01.08.01                           | 11.12.08                 | 10.10.13        | NR     | NR                   | IDU             |
| S900    | M      | 1948       | White     | 01.01.97                           | NR                       | 22.11.13        | NR     | 1965                 | IDU             |
| S906    | F      | 1976       | Asian     | 09.11.08                           | 27.11.13                 | 27.11.13        | NR     | NR                   | Born abroad     |
| S922    | F      | 1972       | White     | 16.07.10                           | NR                       | 17.10.14        | NR     | NR                   | IDU             |
| S924    | M      | 1971       | White     | 01.01.13                           | NR                       | 02.09.14        | 1      | 1991                 | Other           |
| S927    | M      | 1974       | White     | 02.02.07                           | NR                       | 08.05.14        | NR     | 1999                 | IDU             |
| S930    | M      | 1961       | White     | 21.01.13                           | 28.02.13                 | 13.06.14        | 3      | 2010                 | IDU             |
| S934    | M      | 1969       | Other     | 28.07.03                           | NR                       | 04.03.14        | NR     | NR                   | Born abroad     |
| S935    | M      | 1969       | White     | 27.09.07                           | NR                       | 04.03.14        | NR     | NR                   | IDU             |
| S939    | F      | 1991       | White     | 20.03.14                           | NR                       | 12.08.14        | NR     | 2008                 | Blood/ products |

|             |   |      |       |          |    |          |    |      |     |
|-------------|---|------|-------|----------|----|----------|----|------|-----|
| <b>S948</b> | M | 1959 | Mixed | 14.03.07 | NR | 25.07.14 | NR | 2003 | IDU |
|-------------|---|------|-------|----------|----|----------|----|------|-----|
